# Supplementary material
Source: publisher site journal article supplement (http://www.spandidos-publications.com/38/downloadSupplementary)

Figure S1. Endogenous expression of Ehm2/1 and Ehm2/2 in A549 cells was detected by RT-PCR. Ehm2/1 and Ehm2/2 plasmids were used as positive controls.

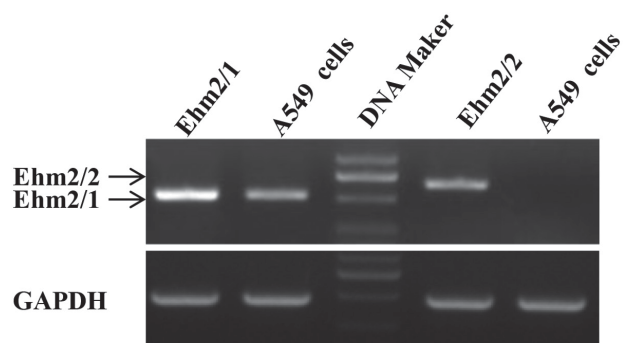

Figure S2. Gelatin zymography assay of the activities of matrix metalloproteinases (MMPs). A549 cells transfected with vector control, Ehm2/1 plasmid, Ehm2/2 plasmid and shRNA against Ehm2/1 were cultured using serum-free medium for 6 h. Conditioned medium was collected and was analyzed via 10% SDS-PAGE containing 0.1% gelatin.

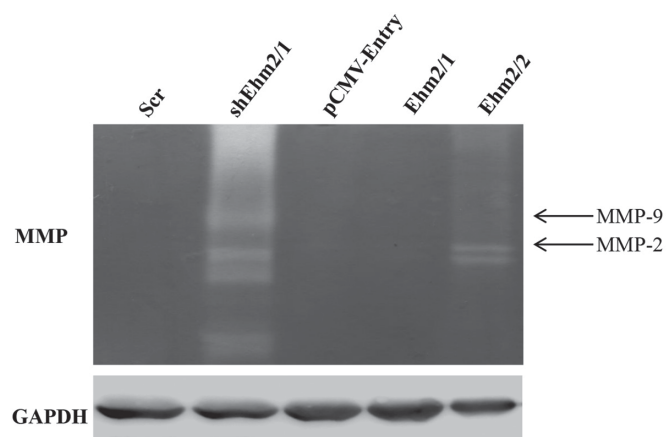

Supplement: Supplementary file 1 [file downloadSupplementary]
